# Supplementary material
Source: HighWire-hosted journal article supplement (https://jnm.snmjournals.org/highwire/filestream/117114/field_highwire_adjunct_files/2/266556_Supplemental_Data_3.xlsx)
Supplement: 266556_Supplemental_Data_3.xlsx [file 266556_Supplemental_Data_3.xlsx]

## Sheet: Sheet1-clinical data
Patient Number	Gender	Age	BMI	Pathology of cervical lymph node	Primary tumor	18F-FDG PET/CT	68Ga-FAPI PET/CT	Contrast-enhanced CT	Contrast-enhanced MRI	Nasopharyngoscopy	Laryngoscopy	EBV-DNA	HPV	EBER	P16	Surgery	Chemotherapy	Radiotherapy	Targeted therapy	Immunotherapy	Progression-free survival
1	Male	72	19.03	Squamous cell carcinoma	Unidentfied	False negative	False negative	False negative	Unknown	Unknown	False negative	Negative	Unknown	Unknown	Unknown	Yes	No	No	No	No	Progression
2	Male	55	21.26	Squamous cell carcinoma	Nasopharynx	True positive	True positive	True positive	True positive	True positive	Unknown	Positive	Unknown	Positive	Unknown	No	Yes	Yes	No	No	Progression free
3	Male	61	22.49	Squamous cell carcinoma	Unidentfied	False negative	False negative	False positive	False positive	False negative	False positive	Negative	Positive	Negative	Negative	Yes	No	No	No	No	Progression free
4	Male	55	22.49	Squamous cell carcinoma	Hypopharynx	False negative	True positive	False positive	False positive	False negative	True positive	Negative	Unknown	Unknown	Unknown	No	Yes	Yes	No	No	Progression free
5	Male	47	28.73	Poorly differentiated carcinoma	Unidentfied	False positive	False negative	False positive	False positive	Unknown	False negative	Negative	Negative	Negative	Positive	No	Yes	Yes	No	No	Progression free
6	Male	60	17.69	Squamous cell carcinoma	Tonsil	True positive	True positive	True positive	Unknown	Unknown	True positive	Unknown	Positive	Negative	Positive	No	Yes	Yes	No	No	Progression free
7	Male	41	26.99	Adenocarcinoma	Submandibular gland	False negative	True positive	False positive	Unknown	Unknown	Unknown	Unknown	Unknown	Unknown	Positive	Yes	Yes	No	No	No	Progression free
8	Male	62	23.72	Squamous cell carcinoma	Unidentfied	False positive	False negative	False positive	False positive	Unknown	False negative	Unknown	Unknown	Negative	Negative	Yes	No	No	No	No	Progression free
9	Male	52	24.09	Squamous cell carcinoma	Nasopharynx	False negative	True positive	Unknown	False positive	True positive	False positive	Positive	Unknown	Unknown	Unknown	No	Yes	Yes	No	No	Progression free
10	Male	50	20.91	Adenocarcinoma	Submandibular gland	False negative	True positive	False negative	False negative	Unknown	False negative	Negative	Unknown	Negative	Negative	Yes	Yes	No	No	No	Progression
11	Female	64	21.1	Squamous cell carcinoma	Thyroid	True positive	True positive	True positive	Unknown	Unknown	Unknown	Unknown	Unknown	Negative	Negative	Yes	Yes	No	No	Yes	Progression free
12	Male	43	23.26	Adenocarcinoma	Thyroid	True positive	True positive	False negative	False negative	Unknown	Unknown	Unknown	Unknown	Unknown	Unknown	Yes	Yes	No	Yes	No	Progression free
13	Female	55	21.64	Squamous cell carcinoma	Unidentfied	False negative	False negative	False negative	Unknown	False positive	False negative	Positive	Unknown	Positive	Negative	No	Yes	Yes	No	No	Progression free
14	Male	58	23.15	Squamous cell carcinoma	Tonsil	False negative	True positive	Unknown	False positive	False negative	False negative	Negative	Positive	Positive	Positive	No	Yes	Yes	No	Yes	Progression free
15	Male	63	22.89	Squamous cell carcinoma	Unidentfied	False negative	False negative	False negative	False negative	False negative	False negative	Negative	Unknown	Unknown	Unknown	Yes	No	No	No	No	Progression
16	Male	63	23.39	Squamous cell carcinoma	Tonsil	False positive	True positive	False positive	False positive	False negative	False negative	Negative	Positive	Unknown	Unknown	Yes	Yes	Yes	No	No	Progression free
17	Female	67	25.96	Squamous cell carcinoma	Unidentfied	False negative	False negative	False positive	False negative	False negative	False negative	Negative	Unknown	Unknown	Unknown	Yes	No	No	No	No	Progression
18	Male	40	24.62	Squamous cell carcinoma	Unidentfied	False positive	False negative	False positive	False positive	False negative	False negative	Negative	Positive	Negative	Positive	Yes	Yes	Yes	No	No	Progression free
19	Male	58	19.61	Squamous cell carcinoma	Tonsil	True positive	True positive	True positive	True positive	Unknown	True positive	Unknown	Unknown	Negative	Negative	Yes	Yes	Yes	No	No	Progression free
20	Male	54	25.71	Squamous cell carcinoma	Hypopharynx	False negative	True positive	False negative	False negative	True positive	False negative	Negative	Unknown	Negative	Negative	Yes	Yes	Yes	No	No	Progression free
21	Male	24	31.05	Squamous cell carcinoma	Unidentfied	False negative	False negative	False negative	False negative	False negative	False positive	Negative	Unknown	Negative	Negative	No	Yes	No	No	No	Progression
22	Male	55	21.01	Squamous cell carcinoma	Tonsil	False negative	True positive	False negative	False negative	Unknown	False negative	Negative	Unknown	Negative	Negative	Yes	Yes	Yes	No	No	Progression free
23	Male	51	25.83	Squamous cell carcinoma	Unidentfied	False negative	False negative	False negative	False positive	False negative	False negative	Negative	Positive	Negative	Positive	Yes	No	No	No	No	Progression
24	Male	65	25.71	Adenocarcinoma	Submandibular gland	True positive	True positive	False negative	Unknown	Unknown	Unknown	Unknown	Unknown	Unknown	Unknown	Yes	Yes	No	No	No	Progression free
25	Male	67	22.49	Adenocarcinoma	Unidentfied	False positive	False negative	False negative	Unknown	Unknown	Unknown	Negative	Unknown	Negative	Unknown	No	Yes	No	No	No	Progression free
26	Male	65	27.36	Squamous cell carcinoma	Unidentfied	False negative	False negative	False negative	Unknown	False negative	False negative	Unknown	Unknown	Unknown	Unknown	No	Yes	Yes	No	Yes	Progression free
27	Male	33	10.42	Squamous cell carcinoma	Nasopharynx (diagnosed clinically)	False negative	True positive	False negative	True positive	True positive	Unknown	Positive	Unknown	Positive	Negative	No	Yes	Yes	No	No	Progression free
28	Male	61	22.04	Squamous cell carcinoma	Unidentfied	False positive	False negative	Unknown	False positive	False negative	False negative	Unknown	Unknown	Unknown	Unknown	No	Yes	No	No	No	Progression free
29	Male	57	25.62	Squamous cell carcinoma	Unidentfied	False negative	False negative	False negative	False negative	False negative	False negative	Unknown	Unknown	Negative	Negative	No	Yes	Yes	Yes	Yes	Progression free
30	Female	72	20.44	Squamous cell carcinoma	Palate	False negative	True positive	False negative	False negative	False negative	False negative	Negative	Unknown	Negative	Unknown	Yes	No	Yes	No	No	Progression free
31	Male	76	20.96	Squamous cell carcinoma	Nasopharynx	True positive	True positive	Unknown	True positive	False negative	Unknown	Positive	Unknown	Positive	Unknown	No	Yes	Yes	Yes	No	Progression free
32	Male	60	22.77	Squamous cell carcinoma	Unidentfied	False positive	False negative	False negative	Unknown	False negative	False negative	Negative	Unknown	Negative	Negative	Yes	Yes	Yes	No	No	Progression free
33	Male	66	20.07	Squamous cell carcinoma	Unidentfied	False negative	False negative	False negative	Unknown	Unknown	False negative	Unknown	Unknown	Unknown	Unknown	No	No	No	No	Yes	Progression free
34	Male	73	21.67	Squamous cell carcinoma	Unidentfied	False negative	False negative	False negative	Unknown	Unknown	Unknown	Negative	Unknown	Positive	Unknown	No	Yes	No	No	No	Progression
35	Male	60	29.41	Squamous cell carcinoma	Unidentfied	False negative	False negative	False positive	False positive	Unknown	False negative	Unknown	Unknown	Negative	Unknown	Yes	Yes	No	No	No	Progression free
36	Male	25	24.91	Squamous cell carcinoma	Unidentfied	False negative	False negative	False negative	False positive	False positive	False negative	Positive	Unknown	Negative	Unknown	No	Yes	Yes	No	No	Progression free
37	Male	50	22.72	Squamous cell carcinoma	Unidentfied	False negative	False negative	False negative	False negative	Unknown	Unknown	Negative	Positive	Negative	Positive	Yes	Yes	Yes	No	No	Progression free
38	Male	51	19.92	Squamous cell carcinoma	Nasopharynx	True positive	True positive	False negative	True positive	True positive	False negative	Positive	Unknown	Positive	Negative	No	Yes	Yes	No	No	Progression free
39	Male	60	22.86	Squamous cell carcinoma	Unidentfied	False positive	False negative	False negative	False negative	False negative	False negative	Negative	Unknown	Negative	Negative	Yes	No	No	No	No	Progression
40	Male	61	20.94	Squamous cell carcinoma	Unidentfied	False negative	False negative	False negative	Unknown	Unknown	Unknown	Unknown	Unknown	Unknown	Unknown	Yes	No	No	No	No	Progression free
41	Male	56	18.93	Squamous cell carcinoma	Tonsil	False positive	True positive	False negative	False negative	Unknown	False negative	Negative	Unknown	Unknown	Unknown	Yes	Yes	Yes	No	No	Progression free
42	Female	42	23.31	Squamous cell carcinoma	Tonsil	False positive	True positive	False positive	False positive	False negative	False negative	Unknown	Negative	Unknown	Positive	Yes	No	Yes	No	No	Progression free
43	Male	67	24.49	Squamous cell carcinoma	Nasopharynx	False negative	True positive	False negative	False negative	False negative	False negative	Positive	Unknown	Positive	Unknown	No	Yes	Yes	No	No	Progression free
44	Male	70	17.69	Squamous cell carcinoma	Unidentfied	False positive	False negative	False positive	False positive	Unknown	False negative	Negative	Unknown	Negative	Unknown	Yes	Yes	Yes	No	No	Progression
45	Female	52	21.94	Squamous cell carcinoma	Tonsil	False negative	True positive	False negative	False negative	Unknown	False negative	Unknown	Unknown	Negative	Negative	No	Yes	Yes	No	Yes	Progression free
46	Male	62	26.26	Squamous cell carcinoma	Nasopharynx (diagnosed clinically)	False negative	True positive	True positive	True positive	False negative	Unknown	Negative	Unknown	Positive	Unknown	Yes	Yes	Yes	No	Yes	Progression free
47	Male	66	27.34	Squamous cell carcinoma	Tonsil (diagnosed clinically)	False negative	True positive	False negative	False negative	False negative	False negative	Negative	Unknown	Negative	Positive	Yes	Yes	Yes	No	No	Progression
48	Male	40	27.46	Squamous cell carcinoma	Unidentfied	False negative	False negative	False negative	False negative	False negative	False negative	Negative	Unknown	Negative	Positive	Yes	No	No	No	No	Progression free
49	Female	58	22.21	Squamous cell carcinoma	Thyroid	True positive	True positive	False negative	False negative	Unknown	False negative	Positive	Unknown	Negative	Positive	Yes	No	Yes	No	No	Progression free
50	Male	57	23.44	Squamous cell carcinoma	Unidentfied	False negative	False negative	False negative	False negative	False negative	False negative	Negative	Unknown	Negative	Negative	No	Yes	Yes	No	No	Progression free
51	Female	62	23.34	Squamous cell carcinoma	Unidentfied	False negative	False negative	False negative	False negative	False negative	False negative	Negative	Unknown	Unknown	Unknown	No	Yes	Yes	No	No	Progression free
52	Male	57	24.62	Squamous cell carcinoma	Unidentfied	False positive	False negative	False negative	False positive	False negative	Unknown	Negative	Unknown	Negative	Positive	No	Yes	Yes	No	No	Progression free
53	Male	45	24.93	Squamous cell carcinoma	Unidentfied	False negative	False negative	False positive	False positive	False positive	Unknown	Unknown	Unknown	Unknown	Unknown	Yes	No	No	No	No	Progression free
54	Female	62	20.81	Squamous cell carcinoma	Tonsil	True positive	True positive	True positive	True positive	False negative	False negative	Negative	Unknown	Unknown	Unknown	Yes	No	No	No	No	Progression free
55	Male	68	23.15	Squamous cell carcinoma	Unidentfied	False negative	False negative	False negative	False negative	False negative	Unknown	Negative	Unknown	Unknown	Unknown	Yes	No	No	No	No	Progression free
56	Male	65	18.65	Squamous cell carcinoma	Tonsil	False negative	True positive	False negative	False negative	Unknown	True positive	Negative	Unknown	Unknown	Unknown	Yes	Yes	Yes	No	No	Progression free
57	Female	38	19.05	Squamous cell carcinoma	Tonsil	True positive	True positive	True positive	True positive	False negative	True positive	Negative	Negative	Unknown	Positive	No	Yes	Yes	No	No	Progression free
58	Female	47	23.05	Squamous cell carcinoma	Unidentfied	False negative	False negative	False negative	False negative	False negative	False negative	Negative	Unknown	Negative	Positive	Yes	Yes	Yes	No	No	Progression free
59	Male	39	24.68	Squamous cell carcinoma	Tonsil	False negative	True positive	False negative	False negative	False negative	False negative	Negative	Positive	Negative	Positive	No	Yes	Yes	No	No	Progression free
60	Male	43	25.54	Squamous cell carcinoma	Nasopharynx	True positive	True positive	False negative	False negative	False negative	False negative	Positive	Unknown	Unknown	Unknown	No	Yes	Yes	No	No	Progression free
61	Male	61	26.42	Squamous cell carcinoma	Unidentfied	False positive	False negative	False negative	False negative	False negative	False positive	Negative	Unknown	Unknown	Unknown	Yes	No	Yes	No	No	Progression free
62	Female	68	26.94	Squamous cell carcinoma	Unidentfied	False positive	False negative	False negative	False negative	False negative	Unknown	Positive	Unknown	Positive	Negative	No	Yes	Yes	No	No	Progression free
63	Male	49	23.05	Squamous cell carcinoma	Nasopharynx	True positive	True positive	True positive	True positive	True positive	Unknown	Positive	Unknown	Positive	Unknown	No	Yes	Yes	No	No	Progression free
64	Male	60	24.39	Poorly differentiated carcinoma	Unidentfied	False positive	False positive	False negative	False negative	Unknown	False negative	Unknown	Unknown	Unknown	Unknown	Yes	Yes	No	No	No	Progression free
65	Male	52	24.09	Squamous cell carcinoma	Tonsil	False negative	True positive	False negative	False negative	False negative	False negative	Unknown	Negative	Positive	Negative	Yes	Yes	Yes	No	No	Progression free
66	Male	67	23.6	Squamous cell carcinoma	Tonsil	False negative	True positive	False negative	False positive	False negative	False negative	Negative	Negative	Negative	Positive	No	Yes	Yes	No	No	Progression free
67	Male	66	24.22	Squamous cell carcinoma	Unidentfied	False negative	False negative	False negative	False negative	False negative	Unknown	Negative	Unknown	Positive	Unknown	No	Yes	Yes	No	No	Progression free
68	Male	64	20.05	Poorly differentiated carcinoma	Unidentfied	False negative	False negative	False negative	False negative	Unknown	False negative	Unknown	Unknown	Negative	Negative	No	Yes	No	Yes	No	Progression free
69	Male	48	22.13	Squamous cell carcinoma	Tonsil (diagnosed clinically)	False negative	True positive	True positive	True positive	False negative	True positive	Unknown	Unknown	Negative	Positive	No	Yes	Yes	No	No	Progression free
70	Female	32	28.73	Squamous cell carcinoma	Unidentfied	False positive	False negative	False negative	False positive	False positive	Unknown	Negative	Unknown	Negative	Negative	No	Yes	No	Yes	No	Progression
71	Female	45	29.3	Squamous cell carcinoma	Tonsil (diagnosed clinically)	False negative	True positive	False negative	False negative	False negative	False negative	Unknown	Unknown	Unknown	Unknown	Yes	Yes	Yes	No	No	Progression free
72	Male	65	19.96	Adenocarcinoma	Unidentfied	False negative	False negative	False negative	Unknown	Unknown	Unknown	Unknown	Unknown	Unknown	Unknown	No	Yes	No	Yes	No	Progression free
73	Male	71	25.16	Squamous cell carcinoma	Laryngopharynx	True positive	True positive	False negative	False negative	False negative	True positive	Negative	Unknown	Unknown	Unknown	Yes	Yes	No	No	Yes	Progression free
74	Male	64	21.97	Squamous cell carcinoma	Tonsil	False negative	True positive	False negative	False negative	False negative	False negative	Negative	Positive	Negative	Positive	Yes	No	Yes	No	No	Progression free
75	Female	69	23.56	Squamous cell carcinoma	Nasopharynx	False negative	True positive	False positive	True positive	True positive	Unknown	Positive	Unknown	Positive	Negative	No	Yes	Yes	Yes	No	Progression free
76	Male	43	21.45	Squamous cell carcinoma	Tonsil	False negative	True positive	False negative	False negative	Unknown	False negative	Unknown	Positive	Positive	Positive	Yes	Yes	Yes	No	No	Progression free
77	Male	62	18.37	Squamous cell carcinoma	Unidentfied	False positive	False negative	False negative	False positive	False negative	False negative	Negative	Unknown	Positive	Negative	No	Yes	No	Yes	No	Progression free
78	Female	58	24.74	Squamous cell carcinoma	Unidentfied	False positive	False negative	False negative	Unknown	False positive	False negative	Negative	Negative	Negative	Negative	No	Yes	No	No	No	Progression free
79	Male	44	30.37	Squamous cell carcinoma	Unidentfied	False positive	False negative	False positive	False positive	False negative	False negative	Unknown	Negative	Negative	Negative	No	Yes	No	Yes	No	Progression free
80	Female	68	21.97	Squamous cell carcinoma	Unidentfied	False positive	False negative	False negative	False negative	Unknown	False negative	Unknown	Negative	Negative	Positive	No	Yes	No	Yes	No	Progression
81	Male	63	19.36	Squamous cell carcinoma	Unidentfied	False positive	False negative	False negative	False negative	False negative	False negative	Unknown	Negative	Negative	Negative	Yes	Yes	No	No	No	Progression free
82	Male	66	16.98	Squamous cell carcinoma	Nasopharynx	False negative	True positive	True positive	True positive	True positive	Unknown	Positive	Unknown	Unknown	Unknown	No	Yes	Yes	No	No	Progression free
83	Male	64	26.12	Squamous cell carcinoma	Nasopharynx (diagnosed clinically)	False negative	True positive	False negative	True positive	False negative	False negative	Negative	Unknown	Positive	Unknown	No	Yes	Yes	No	No	Progression free
84	Male	69	21.22	Squamous cell carcinoma	Tonsil	True positive	True positive	True positive	True positive	Unknown	True positive	Unknown	Unknown	Unknown	Unknown	No	Yes	No	Yes	No	Progression free
85	Male	51	28.36	Squamous cell carcinoma	Tongue	True positive	True positive	False negative	False negative	False negative	False negative	Negative	Negative	Unknown	Unknown	Yes	No	No	No	No	Progression free
86	Male	68	18.34	Adenocarcinoma	Unidentfied	False negative	False negative	False negative	Unknown	Unknown	Unknown	Unknown	Unknown	Unknown	Unknown	Yes	No	No	No	No	Progression free
87	Male	54	21.26	Squamous cell carcinoma	Tonsil	False negative	True positive	False negative	False negative	False negative	False negative	Negative	Unknown	Unknown	Unknown	Yes	Yes	Yes	No	No	Progression free
88	Male	47	24.34	Squamous cell carcinoma	Nasopharynx	True positive	True positive	True positive	True positive	True positive	Unknown	Positive	Unknown	Unknown	Unknown	No	Yes	Yes	No	No	Progression free
89	Female	51	28.93	Squamous cell carcinoma	Nasopharynx (diagnosed clinically)	False positive	True positive	False negative	False negative	False negative	Unknown	Positive	Unknown	Positive	Negative	No	Yes	Yes	No	No	Progression free
90	Male	62	25.06	Squamous cell carcinoma	Unidentfied	False negative	False negative	False negative	False negative	False negative	Unknown	Negative	Unknown	Unknown	Unknown	No	Yes	Yes	No	No	Progression free
91	Male	54	24.84	Squamous cell carcinoma	Unidentfied	False positive	False negative	False positive	False positive	False negative	False negative	Negative	Negative	Negative	Negative	No	No	No	Yes	No	Progression free

## Sheet: Sheet2-PET-CT data
Patient number	Primary tumor	Long diameter (cm)	SUVmax-FDG	TLR-FDG	Readers decision based on 18F-FDG PET/CT	SUVmax-FAPI	TLR-FAPI	Readers decision based on 68Ga-FAPI PET/CT	Metastatic lesion 1	Short diameter (cm)	SUVmax-FDG	TLR-FDG	SUVmax-FAPI	TLR-FAPI	Metastatic lesion 2	Short diameter (cm)	SUVmax-FDG	TLR-FDG	SUVmax-FAPI	TLR-FAPI	Metastatic lesion 3	SUVmax-FDG	TLR-FDG	SUVmax-FAPI	TLR-FAPI	Metastatic lesion 4	SUVmax-FDG	TLR-FDG	SUVmax-FAPI	TLR-FAPI
1	Unidentfied	-	-	-	False negative	-	-	False negative	Neck level IIB LN	4	25.6	12.1905	14.9	29.8	-	-	-	-	-	-	-	-	-	-	-	-	-	-	-	-
2	Nasopharynx	0.9	5.8	2.52174	True positive	8.8	17.6	True positive	Neck level IIB LN	1.6	25.9	11.2609	6.4	12.8	Neck level IIB LN	0.7	18.5	8.04348	8.6	17.2	-	-	-	-	-	-	-	-	-	-
3	Unidentfied	-	-	-	False negative	-	-	False negative	Neck level IIB LN	1.8	17.5	6.48148	5.7	6.33333	Neck level IIA LN	1.3	14.4	5.33333	3.7	4.11111	-	-	-	-	-	-	-	-	-	-
4	Hypopharynx	0.5	0	0	False negative	3.2	5.33333	True positive	Neck level IIB LN	2.4	8.6	4.3	6.1	10.1667	-	-	-	-	-	-	-	-	-	-	-	-	-	-	-	-
5	Unidentfied	-	-	-	False positive	-	-	False negative	Neck level IIA LN	3.2	7.3	3.17391	3.1	2.58333	-	-	-	-	-	-	-	-	-	-	-	-	-	-	-	-
6	Tonsil	2.7	11.1	4.82609	True positive	4.3	8.6	True positive	Neck level IIA LN	2.2	7.9	3.43478	3	6	Neck level IIA LN	1.1	7.9	3.43478	2.8	5.6	-	-	-	-	-	-	-	-	-	-
7	Submandibular gland	1.2	0	0	False negative	15.1	13.7273	True positive	Neck level IA LN	1	5.3	2.12	13.6	12.3636	Neck level III LN	0.7	1.9	0.76	12.2	11.0909	Left acetabulum	8.8	3.52	20.5	18.6364	-	-	-	-	-
8	Unidentfied	-	-	-	False positive	-	-	False negative	Neck level IIA LN	2.4	17.9	6.62963	7.5	15	Neck level III LN	1.2	12.8	4.74074	3.7	7.4	-	-	-	-	-	-	-	-	-	-
9	Nasopharynx	0.6	0	0	False negative	2.6	2.6	True positive	Neck level VA LN	0.9	5.8	2.63636	3.3	3.3	Neck level IIB LN	0.7	5.9	2.68182	3.1	3.1	-	-	-	-	-	-	-	-	-	-
10	Submandibular gland	2.3	0	0	False negative	16.5	12.6923	True positive	Neck level IA LN	1.3	13.3	6.04545	13.9	10.6923	Neck level IIB LN	1	15.8	7.18182	18.7	14.3846	Fifth cervical vertebra	8	3.63636	18.2	14	-	-	-	-	-
11	Thyroid	1.5	13.9	5.56	True positive	13.9	19.8571	True positive	Chest level 2L LN	1.2	6.2	2.48	3.6	5.14286	Neck level IV LN	0.6	4.4	1.76	5.1	7.28571	-	-	-	-	-	-	-	-	-	-
12	Thyroid	0.9	3.3	1.32	True positive	5.8	14.5	True positive	Neck level IV LN	4.6	20	8	15.4	38.5	Neck level IV LN	1.3	5.7	2.28	14.9	37.25	-	-	-	-	-	-	-	-	-	-
13	Unidentfied	-	-	-	False negative	-	-	False negative	Neck level IIA LN	2	12.7	4.88462	4	6.66667	Neck level IIB LN	1.4	15.2	5.84615	10	16.6667	-	-	-	-	-	-	-	-	-	-
14	Tonsil	1.3	0	0	False negative	11.5	10.4545	True positive	Neck level IIB LN	1.6	9.4	4.7	15	13.6364	Neck level IIB LN	1	6.8	3.4	13.8	12.5455	-	-	-	-	-	-	-	-	-	-
15	Unidentfied	-	-	-	False negative	-	-	False negative	Neck level IA LN	1.2	7.8	3.12	9.4	13.4286	-	-	-	-	-	-	-	-	-	-	-	-	-	-	-	-
16	Tonsil	1.5	0	0	False positive	8.3	8.3	True positive	Neck level IIA LN	2	6.9	2.65385	8.2	8.2	Neck level IIB LN	0.8	5.9	2.26923	7.5	7.5	-	-	-	-	-	-	-	-	-	-
17	Unidentfied	-	-	-	False negative	-	-	False negative	Neck level IIB LN	1.1	16.9	10.5625	14.7	29.4	Neck level IIA LN	0.8	6.1	3.8125	8.7	17.4	-	-	-	-	-	-	-	-	-	-
18	Unidentfied	-	-	-	False positive	-	-	False negative	Excision	-	-	-	-	-	-	-	-	-	-	-	-	-	-	-	-	-	-	-	-	-
19	Tonsil	1.3	13.3	5.32	True positive	5.1	12.75	True positive	Neck level IIA LN	1.8	23.7	9.48	9.5	23.75	Neck level III LN	1.2	21.5	8.6	7.5	18.75	-	-	-	-	-	-	-	-	-	-
20	Hypopharynx	0.6	0	0	False negative	3.6	9	True positive	Neck level IIA LN	1.6	7.6	3.30435	12.8	32	-	-	-	-	-	-	-	-	-	-	-	-	-	-	-	-
21	Unidentfied	-	-	-	False negative	-	-	False negative	Neck level IIB LN	2.5	13.9	5.14815	13.9	19.8571	Neck level IIB LN	2.3	10	3.7037	11.9	17	Second lumbar vertebra	13.2	4.88889	8.1	11.5714	Sacrum	13.9	5.14815	18.1	25.8571
22	Tonsil	0.6	0	0	False negative	2.9	7.25	True positive	Neck level IIA LN	2	10.4	4.95238	7	17.5	Neck level IIB LN	1.6	8.5	4.04762	7.9	19.75	-	-	-	-	-	-	-	-	-	-
23	Unidentfied	-	-	-	False negative	-	-	False negative	Neck level IIB LN	1.4	23.7	9.48	11.3	22.6	Neck level IIA LN	1.9	12.3	4.92	9.9	19.8	-	-	-	-	-	-	-	-	-	-
24	Submandibular gland	2.4	4.7	2.13636	True positive	11.9	23.8	True positive	Neck level IIB LN	2.5	7.9	3.59091	12	24	Neck level VB LN	2.2	7.5	3.40909	11.4	22.8	-	-	-	-	-	-	-	-	-	-
25	Unidentfied	-	-	-	False positive	-	-	False negative	Neck level V LN	4.1	21	12.3529	10.3	25.75	Neck level V LN	1.4	16.6	9.76471	2.6	6.5	-	-	-	-	-	-	-	-	-	-
26	Unidentfied	-	-	-	False negative	-	-	False negative	Neck level IIA LN	3.2	16.8	5.7931	11.2	37.3333	-	-	-	-	-	-	-	-	-	-	-	-	-	-	-	-
27	Nasopharynx (diagnosed clinically)	0.9	0	0	False negative	3.4	5.66667	True positive	Neck level IIB LN	3.7	17.8	8.09091	11.3	18.8333	-	-	-	-	-	-	-	-	-	-	-	-	-	-	-	-
28	Unidentfied	-	-	-	False positive	-	-	False negative	Neck level IIA LN	1.2	9.9	4.30435	6.7	16.75	Neck level IIB LN	1.2	5.9	2.56522	7.1	17.75	Right ilium	7.6	3.30435	13.3	33.25	Left pubis	9.8	4.26087	13.9	34.75
29	Unidentfied	-	-	-	False negative	-	-	False negative	Neck level IIA LN	2.4	19.6	9.33333	18.8	26.8571	Neck level V LN	3.2	28.5	13.5714	15.7	22.4286	Second thoracic vertebra	24.4	11.619	14.2	20.2857	Fourth thoracic vertebra	20.7	9.85714	14.8	21.1429
30	Palate	1.6	0	0	False negative	11.3	22.6	True positive	Neck level IIA LN	2	30.1	11.1481	16.3	32.6	-	-	-	-	-	-	-	-	-	-	-	-	-	-	-	-
31	Nasopharynx	0.8	3.9	1.95	True positive	6.9	13.8	True positive	Neck level IIB LN	2.9	17	8.5	10.8	21.6	Neck level IIA LN	1.4	7.5	3.75	10.8	21.6	-	-	-	-	-	-	-	-	-	-
32	Unidentfied	-	-	-	False positive	-	-	False negative	Neck level IIB LN	3.6	15.3	6.65217	14.5	24.1667	-	-	-	-	-	-	-	-	-	-	-	-	-	-	-	-
33	Unidentfied	-	-	-	False negative	-	-	False negative	Neck level IV LN	3.3	15.6	7.8	10	20	Neck level IV LN	1	13.1	6.55	7.3	14.6	Right fifth rib	1.3	0.65	4.6	9.2	-	-	-	-	-
34	Unidentfied	-	-	-	False negative	-	-	False negative	Neck level IV LN	2.1	10	5	8.4	16.8	-	-	-	-	-	-	-	-	-	-	-	-	-	-	-	-
35	Unidentfied	-	-	-	False negative	-	-	False negative	Neck level IV LN	2.7	11.8	3.80645	11	18.3333	Neck level III LN	1.5	12.9	4.16129	9.6	16	-	-	-	-	-	-	-	-	-	-
36	Unidentfied	-	-	-	False negative	-	-	False negative	Neck level IIB LN	4.9	15.2	8.44444	36.5	52.1429	Neck level IIA LN	1.5	13.7	7.61111	17.1	24.4286	-	-	-	-	-	-	-	-	-	-
37	Unidentfied	-	-	-	False negative	-	-	False negative	Excision	-	-	-	-	-	-	-	-	-	-	-	-	-	-	-	-	-	-	-	-	-
38	Nasopharynx	0.8	3.4	1.7	True positive	4.3	6.14286	True positive	Neck level IIA LN	1.2	7.3	3.65	6.1	8.71429	Neck level IIB LN	1	7	3.5	7.7	11	-	-	-	-	-	-	-	-	-	-
39	Unidentfied	-	-	-	False positive	-	-	False negative	Neck level IIA LN	2.5	17.8	9.36842	17.6	25.1429	-	-	-	-	-	-	-	-	-	-	-	-	-	-	-	-
40	Unidentfied	-	-	-	False negative	-	-	False negative	Excision	-	-	-	-	-	-	-	-	-	-	-	-	-	-	-	-	-	-	-	-	-
41	Tonsil	1.4	0	0	False positive	2.6	3.71429	True positive	Neck level IIA LN	2.2	5.1	2.55	9.4	13.4286	-	-	-	-	-	-	-	-	-	-	-	-	-	-	-	-
42	Tonsil	1.3	0	0	False positive	3.3	5.5	True positive	Excision	-	-	-	-	-	-	-	-	-	-	-	-	-	-	-	-	-	-	-	-	-
43	Nasopharynx	1	0	0	False negative	5.7	14.25	True positive	Neck level IIB LN	1.4	5.2	2.47619	8.9	22.25	Neck level IIB LN	1.3	5.6	2.66667	8.4	21	-	-	-	-	-	-	-	-	-	-
44	Unidentfied	-	-	-	False positive	-	-	False negative	Neck level IIA LN	5	14.9	8.76471	19.1	38.2	-	-	-	-	-	-	-	-	-	-	-	-	-	-	-	-
45	Tonsil	1.1	0	0	False negative	2.8	5.6	True positive	Neck level IV LN	4.3	6.3	3.15	11.5	23	-	-	-	-	-	-	-	-	-	-	-	-	-	-	-	-
46	Nasopharynx (diagnosed clinically)	1.2	0	0	False negative	4.4	14.6667	True positive	Excision	-	-	-	-	-	-	-	-	-	-	-	-	-	-	-	-	-	-	-	-	-
47	Tonsil (diagnosed clinically)	1.1	0	0	False negative	3.8	9.5	True positive	Neck level IIA LN	2.6	10.1	4.3913	12.5	31.25	-	-	-	-	-	-	-	-	-	-	-	-	-	-	-	-
48	Unidentfied	-	-	-	False negative	-	-	False negative	Excision	-	-	-	-	-	-	-	-	-	-	-	-	-	-	-	-	-	-	-	-	-
49	Thyroid	1.9	8.9	4.04545	True positive	10.1	6.3125	True positive	Excision	-	-	-	-	-	-	-	-	-	-	-	-	-	-	-	-	-	-	-	-	-
50	Unidentfied	-	-	-	False negative	-	-	False negative	Neck level IV LN	2.5	13.6	6.47619	16.1	53.6667	Neck level III LN	1.3	10.5	5	14.9	49.6667	-	-	-	-	-	-	-	-	-	-
51	Unidentfied	-	-	-	False negative	-	-	False negative	Neck level IIB LN	3	7.6	3.16667	5	7.14286	-	-	-	-	-	-	-	-	-	-	-	-	-	-	-	-
52	Unidentfied	-	-	-	False positive	-	-	False negative	Excision	-	-	-	-	-	-	-	-	-	-	-	-	-	-	-	-	-	-	-	-	-
53	Unidentfied	-	-	-	False negative	-	-	False negative	Neck level III LN	1	9.6	4.8	8.2	20.5	-	-	-	-	-	-	-	-	-	-	-	-	-	-	-	-
54	Tonsil	1.6	7.9	3.95	True positive	11.4	28.5	True positive	Neck level IIB LN	1.2	6.5	3.25	10.4	26	Neck level IIB LN	1.1	7.1	3.55	4.6	11.5	-	-	-	-	-	-	-	-	-	-
55	Unidentfied	-	-	-	False negative	-	-	False negative	Neck level IIA LN	1.4	3.5	1.66667	3.9	6.5	-	-	-	-	-	-	-	-	-	-	-	-	-	-	-	-
56	Tonsil	0.8	0	0	False negative	3	10	True positive	Neck level IIA LN	3.7	28.6	11	16.2	54	-	-	-	-	-	-	-	-	-	-	-	-	-	-	-	-
57	Tonsil	1.5	10.2	7.84615	True positive	6.3	12.6	True positive	Neck level IIA LN	2.8	14	10.7692	14.8	29.6	-	-	-	-	-	-	-	-	-	-	-	-	-	-	-	-
58	Unidentfied	-	-	-	False negative	-	-	False negative	Excision	-	-	-	-	-	-	-	-	-	-	-	-	-	-	-	-	-	-	-	-	-
59	Tonsil	0.9	0	0	False negative	3.6	6	True positive	Neck level IIA LN	1.1	12.3	7.23529	4.8	8	-	-	-	-	-	-	-	-	-	-	-	-	-	-	-	-
60	Nasopharynx	0.9	3.7	1.7619	True positive	2.7	5.4	True positive	Neck level IIB LN	1.5	17.5	8.33333	9	18	-	-	-	-	-	-	-	-	-	-	-	-	-	-	-	-
61	Unidentfied	-	-	-	False positive	-	-	False negative	Neck level IIA LN	2.7	8.7	4.57895	9.9	9.9	-	-	-	-	-	-	-	-	-	-	-	-	-	-	-	-
62	Unidentfied	-	-	-	False positive	-	-	False negative	Neck level IIA LN	1.9	11.6	4.64	5	16.6667	Neck level IIB LN	1.2	5.8	2.32	7.1	23.6667	-	-	-	-	-	-	-	-	-	-
63	Nasopharynx	0.8	4.4	1.91304	True positive	3.3	8.25	True positive	Neck level IIA LN	1.8	10.2	4.43478	11.9	29.75	Neck level IIB LN	0.9	4.2	1.82609	6.2	15.5	-	-	-	-	-	-	-	-	-	-
64	Unidentfied	-	-	-	False positive	-	-	False positive	Excision	-	-	-	-	-	-	-	-	-	-	-	-	-	-	-	-	-	-	-	-	-
65	Tonsil	1.8	0	0	False negative	3.9	4.875	True positive	Neck level IIB LN	2.2	9.4	3.35714	7.3	9.125	-	-	-	-	-	-	-	-	-	-	-	-	-	-	-	-
66	Tonsil	0.9	0	0	False negative	5	5.55556	True positive	Excision	-	-	-	-	-	-	-	-	-	-	-	-	-	-	-	-	-	-	-	-	-
67	Unidentfied	-	-	-	False negative	-	-	False negative	Excision	-	-	-	-	-	-	-	-	-	-	-	-	-	-	-	-	-	-	-	-	-
68	Unidentfied	-	-	-	False negative	-	-	False negative	Neck level III LN	5.1	16.2	7.36364	10.5	17.5	Neck level IB LN	1.7	16.6	7.54545	9	15	-	-	-	-	-	-	-	-	-	-
69	Tonsil (diagnosed clinically)	1.3	0	0	False negative	3.4	6.8	True positive	Excision	-	-	-	-	-	-	-	-	-	-	-	-	-	-	-	-	-	-	-	-	-
70	Unidentfied	-	-	-	False positive	-	-	False negative	Neck level IIA LN	2.4	15.5	7.75	6	15	Neck level IIB LN	0.9	9.6	4.8	4.8	12	-	-	-	-	-	-	-	-	-	-
71	Tonsil (diagnosed clinically)	1	0	0	False negative	3.9	9.75	True positive	Excision	-	-	-	-	-	-	-	-	-	-	-	-	-	-	-	-	-	-	-	-	-
72	Unidentfied	-	-	-	False negative	-	-	False negative	Neck level IV LN	1.3	14.7	6.68182	12	24	Neck level IV LN	1.2	9.7	4.40909	10	20	Occipital bone	3	1.36364	21.5	43	-	-	-	-	-
73	Laryngopharynx	0.8	5.4	2.57143	True positive	2.8	4.66667	True positive	Neck level IIA LN	3.1	29.1	13.8571	11.4	19	-	-	-	-	-	-	-	-	-	-	-	-	-	-	-	-
74	Tonsil	0.8	0	0	False negative	2.8	5.6	True positive	Neck level IIA LN	2	4.3	2.04762	4.3	8.6	-	-	-	-	-	-	-	-	-	-	-	-	-	-	-	-
75	Nasopharynx	1.1	0	0	False negative	2.7	5.4	True positive	Neck level IIA LN	2.6	17.2	7.16667	11.4	22.8	Neck level IIB LN	1.5	20.2	8.41667	14.9	29.8	-	-	-	-	-	-	-	-	-	-
76	Tonsil	1.1	0	0	False negative	4.4	7.33333	True positive	Neck level IIA LN	1.7	4	1.73913	3.8	6.33333	-	-	-	-	-	-	-	-	-	-	-	-	-	-	-	-
77	Unidentfied	-	-	-	False positive	-	-	False negative	Neck level IIA LN	1.6	12.4	5.90476	7.8	15.6	Neck level III LN	1.5	11.7	5.57143	7.4	14.8	-	-	-	-	-	-	-	-	-	-
78	Unidentfied	-	-	-	False positive	-	-	False negative	Neck level IIA LN	1.3	15.7	7.47619	8.1	13.5	Neck level IIB LN	1.2	16.6	7.90476	8.6	14.3333	Sternum	16.4	7.80952	17.1	28.5	Lift fifth rib	11.8	5.61905	15.1	25.1667
79	Unidentfied	-	-	-	False positive	-	-	False negative	Neck level IIA LN	4.1	16	6.4	11.8	19.6667	Neck level IIB LN	1.4	4.8	1.92	4.5	7.5	-	-	-	-	-	-	-	-	-	-
80	Unidentfied	-	-	-	False positive	-	-	False negative	Neck level IIB LN	2.8	18.8	6.48276	11.4	28.5	Neck level IIA LN	1.5	17	5.86207	9.3	23.25	-	-	-	-	-	-	-	-	-	-
81	Unidentfied	-	-	-	False positive	-	-	False negative	Neck level III LN	3	15.4	7.33333	9	15	Neck level IIB LN	1.7	18.2	8.66667	6.9	11.5	-	-	-	-	-	-	-	-	-	-
82	Nasopharynx	1	0	0	False negative	3.5	5.83333	True positive	Neck level IV LN	1.7	6.8	4	4.3	7.16667	Neck level IIB LN	0.9	6.5	3.82353	4.2	7	Fourth thoracic vertebra	6.8	4	8.3	13.8333	Eighth thoracic vertebra	7.9	4.64706	10.7	17.8333
83	Nasopharynx (diagnosed clinically)	0.8	0	0	False negative	4.3	14.3333	True positive	Neck level IIA LN	2.3	16.2	8.52632	11.3	37.6667	Neck level IIB LN	1.9	9	4.73684	3.9	13	-	-	-	-	-	-	-	-	-	-
84	Tonsil	4.7	20.8	7.7037	True positive	21.1	30.1429	True positive	Neck level III LN	3.1	17.7	6.55556	24.1	34.4286	Neck level IIA LN	1.7	14.8	5.48148	18.9	27	-	-	-	-	-	-	-	-	-	-
85	Tongue	1.8	14	7	True positive	7.9	26.3333	True positive	Neck level III LN	0.7	4	2	3	10	-	-	-	-	-	-	-	-	-	-	-	-	-	-	-	-
86	Unidentfied	-	-	-	False negative	-	-	False negative	Excision	-	-	-	-	-	-	-	-	-	-	-	-	-	-	-	-	-	-	-	-	-
87	Tonsil	1.5	0	0	False negative	5.3	13.25	True positive	Neck level IIA LN	1.3	12.9	5.6087	5.4	13.5	Neck level IIA LN	0.7	9.4	4.08696	4	10	-	-	-	-	-	-	-	-	-	-
88	Nasopharynx	2.4	10.5	4.375	True positive	5.6	11.2	True positive	Neck level IIA LN	1.8	9.5	3.95833	9.7	19.4	Retropharyngeal LN	1.6	9.5	3.95833	8	16	-	-	-	-	-	-	-	-	-	-
89	Nasopharynx (diagnosed clinically)	0.4	0	0	False positive	2	2.85714	True positive	Neck level IIA LN	2.1	14.6	6.95238	16.2	23.1429	-	-	-	-	-	-	-	-	-	-	-	-	-	-	-	-
90	Unidentfied	-	-	-	False negative	-	-	False negative	Excision	-	-	-	-	-	-	-	-	-	-	-	-	-	-	-	-	-	-	-	-	-
91	Unidentfied	-	-	-	False positive	-	-	False negative	Neck level III LN	2.1	19.8	8.25	10.7	21.4	Neck level IIA LN	2.5	13.9	5.79167	11.2	22.4	Sternum	9.1	3.79167	6.4	12.8	-	-	-	-	-
